# Supplementary material
Source: MDPI journal article supplement (https://www.mdpi.com/2073-4441/12/11/3098)
Supplement: s1 [file s1]

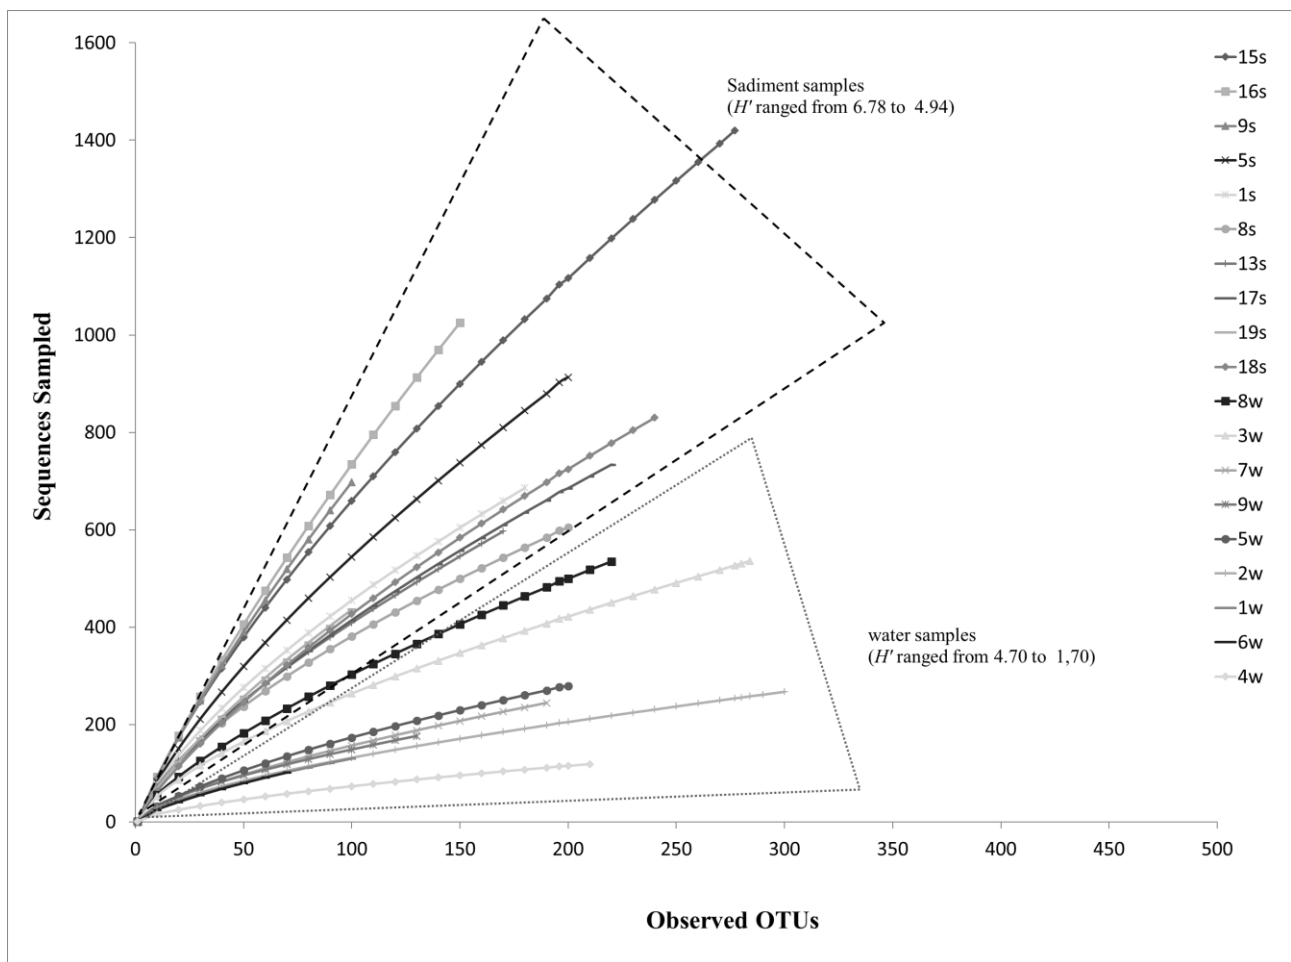

**Figure 1.** Rarefaction curves constructed with the `mothur rarefaction.single` command, using a resampling without replacement approach.
